# Supplementary material for: Endogenous siRNAs promote proteostasis and longevity in germline-less Caenorhabditis elegans
Source: eLife. 2020 Mar 26;9:e50896. doi: 10.7554/eLife.50896 (PMC7136021; doi:10.7554/eLife.50896)
Supplement: Supplementary file 1. [file elife-50896-supp1.xlsx]

## Sheet: Sheet1
Supplementary File 1.- Related to Figure 1 and Figure 4. Lifespan analysis of mutants with defective processing of endo-siRNA and inactivation of ptp-5.1.
strain	mean lifespan	Effect on lifespan by dcr-1(mg375)	Wilcoxon P- value relative to control	comments
Wild type	17.8			Fig. 1A
dcr-1 (mg375)	15.5	0.87	0.009	Fig. 1A
glp-1	26.9			Fig. 1A
dcr-1(mg375) glp-1	20	0.74	<0.0001	Fig. 1A
Wild type	17.1
dcr-1 (mg375)	16.6	0.97	0.843
glp-1	25.3
dcr-1(mg375) glp-1	22.2	0.87	0.021
Wild type	17.4
dcr-1 (mg375)	19.5	1.12	0.05
glp-1	29.8
dcr-1(mg375) glp-1	25.4	0.85	0.008
Wild type	17.4
dcr-1 (mg375)	16.3	0.93	0.07
glp-1	21.4
dcr-1(mg375) glp-1	17.2	0.8	0.001
Wild type	14.1
dcr-1 (mg375)	16.2	1.14	0.09
glp-1	23.3
dcr-1(mg375) glp-1	21	0.9	0.042
Wild type	15.78
dcr-1 (mg375)	16.59	1.05	0.327
glp-1	24.4
dcr-1(mg375) glp-1	18.45	0.75	0.001
strain	mean lifespan	Effect on lifespan by sid-1(mg375)	Wilcoxon P- value relative to control	comments
Wild type	9.225			Fig. 1B
dcr-1(mg375)	8.042	0.871762	0,005	Fig. 1B
Wild type+DGLA	12.833			Fig. 1B
dcr-1 (mg375)+DGLA	6.842	0.533157	<0.0001	Fig. 1B
Wild type	9.908
dcr-1(mg375)	10.35	1.04461	0.235
Wild type+DGLA	15.067
dcr-1 (mg375)+DGLA	10.267	0.681423	<0.0001
Wild type	7.475
dcr-1(mg375)	7.033	0.94087	0.429
Wild type+DGLA	12.95
dcr-1 (mg375)+DGLA	7.867	0.60749	<0.0001
strain	mean lifespan	Effect on lifespan by rrf-3(pk1426)	Wilcoxon P- value relative to control	comments
Wild type	14.7			Fig. 1C
rrf-3	13.1	0.89	0.014	Fig. 1C
glp-1	22.4			Fig. 1C
rrf-3 glp-1	16.7	0.74	<0.0001	Fig. 1C
Wild type	15.9
rrf-3	13.3	0.83	0.001
glp-1	23.3
rrf-3 glp-1	15.9	0.68	<0.0001
Wild type	15.78
rrf-3	13.74	0.87	0.01
glp-1	24.4
rrf-3 glp-1	16.94	0.69	<0.0001
strain	mean lifespan	Effect on lifespan by ergo-1(gg98)	Wilcoxon P- value relative to control	comments
Wild type	13.3			Fig. 1D
ergo-1	12.7	0.95	0.32	Fig. 1D
glp-1	24.6			Fig. 1D
glp-1; ergo-1	18.3	0.74	0.01	Fig. 1D
Wild type	14.3
ergo-1	13	0.9	0.067
glp-1	28.5
glp-1; ergo-1	21.7	0.76	0.017
Wild type	15.78
ergo-1	15.35	0.97	0.579
glp-1	24.4
glp-1; ergo-1	16.42	0.67	<0.0001
strain	mean lifespan	Effect on lifespan by nrde-3(gg66)	Wilcoxon P- value relative to control	comments
Wild type	14.4			Fig. 1E
nrde-3	12.9	0.89	0.1	Fig. 1E
glp-1	19.4			Fig. 1E
glp-1; nrde-3	13.1	0.67	<0.0001	Fig. 1E
Wild type	14.5
nrde-3	12.1	0.85	<0.0001
glp-1	20.3
glp-1; nrde-3	14.2	0.69	<0.0001
Wild type	14.1
nrde-3	14.9	1.05	0.17
glp-1	23.3
glp-1; nrde-3	15.6	0.66	<0.0001
strain	mean lifespan	Effect on lifespan by sid-1(mg375)	Wilcoxon P- value relative to control	comments
Wild type	15.78			Fig. 1F
sid-1	16.45	1.04	0.492	Fig. 1F
glp-1	24.4			Fig. 1F
glp-1;sid-1	23.73	0.97	0.768	Fig. 1F
Wild type	16.2
sid-1	16.7	1.03	0.78
glp-1	26.1
glp-1;sid-1	24.3	0.93	0.233
Wild type	17.8
sid-1	18.6	1.04	0.612
glp-1	26.9
glp-1;sid-1	23.8	0.88	0.122
strain	mean lifespan	Effect on lifespan by ptp-5.1(tm6122)	Wilcoxon P- value relative to control	comments
Wild type	15.78			Fig. 4D
ptp-5.1	14.81	0.93	0.249	Fig. 4D
dcr-1(mg375)	16.59			Fig. 4D
dcr-1(mg375);ptp-5.1	15.96	0.96	0.3	Fig. 4D
glp-1	24.4			Fig. 4D
glp-1;ptp-5.1	22.98	0.94	0.324	Fig. 4D
dcr-1(mg375) glp-1	18.45			Fig. 4D
dcr-1(mg375) glp-1;ptp-5.1	27.21	1.47	<0.0001	Fig. 4D
Wild type	14.1
ptp-5.1	14.8	1.04	0.55
dcr-1(mg375)	16.2
dcr-1(mg375);ptp-5.1	15.7	0.96	0.87
glp-1	23.3
glp-1;ptp-5.1	21.7	0.93	0.07
dcr-1(mg375) glp-1	21
dcr-1(mg375) glp-1;ptp-5.1	26.2	1.24	0.002
Wild type	17.4
ptp-5.1	16.1	0.92	0.144
dcr-1(mg375)	16.3
dcr-1(mg375);ptp-5.1	17.8	1.09	0.67
glp-1	21.4
glp-1;ptp-5.1	20.6	0.96	0.47
dcr-1(mg375) glp-1	17.2
dcr-1(mg375) glp-1;ptp-5.1	22.5	1.3	<0.0001
Each boxed panel within the tables includes lifespan data of experiments performed in parallel.
Statistical analysis and comparisons were done within each panel.
Lifespan experiments were carried out at 25°C until day-1 and then shifted to 20°C .
DGLA experiments were carried out at at 20°C from eggs and henceforth.
