# Supplementary material for: Endogenous siRNAs promote proteostasis and longevity in germline-less Caenorhabditis elegans
Source: eLife. 2020 Mar 26;9:e50896. doi: 10.7554/eLife.50896 (PMC7136021; doi:10.7554/eLife.50896)
Supplement: Supplementary file 2. [file elife-50896-supp2.xlsx]

## Sheet: גיליון1
Supplementary File 2. Related to Figure 2. 72 genes whose levels decreased by more than 1.5 fold in dcr-1 glp-1 double mutants compared to glp-1 single mutants (p-value<0.05)
Probeset ID	p-value(wt vs. dcr-1)	Fold-Change(wt vs. dcr-1)	p-value(glp-1 vs. dcr-1 glp-1)	Fold-Change(glp-1 vs. dcr-1 glp-1)	Brunquell et al., 2016
aip-1	0.146307	1.6781	0.0297862	2.27356	+
C01F1.5	0.125111	2.12863	0.000144381	12.227
C30H6.5	0.392029	1.35971	0.00356019	3.49131
C46E10.1	0.680202	-1.17418	0.021924	2.71899
CELE_F57G8.7	0.602393	-1.1586	0.00265034	2.8249
CELE_T07G12.3	0.588626	1.37705	0.0144859	5.17485
CELE_T08G5.3	0.820195	1.12353	0.0271044	3.5304
CELE_Y38H6C.8	0.0763107	3.41466	0.0234334	5.17194
CELE_Y47G6A.30	0.128438	1.36236	0.0498411	1.51124
CELE_Y53F4B.25	0.199119	2.08475	0.0386157	3.50871
CELE_ZC513.2	0.384333	1.39634	0.0339703	2.42223
clec-227	0.936411	1.01623	0.0452244	1.55501
col-137	0.267285	1.69732	0.0125328	3.79549	+
col-40	0.0498638	2.9481	2.44441e-05	26.7235
col-88	0.341017	1.61636	0.0355241	3.1483	+
ctl-2	0.935564	-1.02181	3.65639e-06	8.13603
D2013.9.2	0.0849907	1.80682	0.0257728	2.22885
D2089.2	0.364106	-1.30457	0.0119648	2.30178
dct-10	0.0623625	2.09435	0.0359701	2.33864
EB994724	0.482443	1.3257	0.000556121	6.11315
efk-1	0.464935	1.14913	0.0308364	1.56896
F25D7.5	0.811274	1.03843	0.00212453	1.82571
F31C3.5	0.45669	-1.18421	0.0296713	1.71988
F31D4.5	0.206369	-1.21792	0.00244558	1.75688
F44B9.2	0.266733	1.31501	0.0400549	1.71805
F44E5.5	0.231628	2.06337	0.0148237	5.12526	+
F49C12.10	0.384741	1.27263	0.0335532	1.8988
grl-27	0.0778661	2.07799	0.00954136	3.21688	+
grl-30	0.139458	1.61181	0.0387575	2.01323
grl-31	0.171446	1.81438	0.0157005	3.16319
his-5	0.0163696	-1.47141	0.00494524	1.60893	+
hsp-12.6	0.393875	1.33002	0.0420416	2.08281
hsp-16.2	0.106266	2.40256	0.0145103	4.18935	+
hsp-16.41	0.177585	1.91816	0.013625	3.71877	+
hsp-70	0.172357	2.2035	0.0335335	3.69302	+
jud-4	0.348441	1.35588	0.0420684	2.03355
K10H10.4	0.37488	1.44762	0.0477217	2.42292	+
lin-9	0.912395	-1.02055	0.0424659	1.50828
mdt-30	0.749788	1.05775	0.022508	1.5687
mml-1	0.709752	1.09094	0.0167235	1.88575
nas-30	0.278406	1.40325	0.0159903	2.30729
nhr-17	0.0642234	1.82887	0.0424285	1.95908
NP012255	0.49082	-1.33765	0.0460114	2.4862
nxf-1	0.88906	-1.018	0.00312334	1.586
osm-10	0.706448	1.08628	0.046001	1.61196
pme-4	0.80462	1.11352	0.038158	2.69147
R05H10.1	0.320834	1.28698	0.0221585	1.89588	+
R11A5.3	0.135957	2.22945	0.0220808	3.73589	+
rps-27	0.875848	-1.01882	0.000113916	1.92639	+
scp-1	0.140321	1.89681	0.0406666	2.53423	+
srsx-18	0.56506	-1.14476	0.0431532	1.67631
T09B9.1	0.785027	-1.13416	0.0197081	3.36518
T18H9.1	0.462639	1.40852	0.0508906	2.6622
T21D11.1	0.786308	1.09841	0.036902	2.2137
T23G11.7a	0.861495	-1.07464	0.0447969	2.47094
T24A6.21	0.115389	2.02222	0.00575502	4.01812
T24A6.3	0.0615556	1.91099	0.00251874	3.30108
T27E4.3	0.22311	1.77	0.0241478	3.14585
T27E4.8	0.200189	1.87488	0.0136525	3.81366
TC179950	0.989675	-1.00257	0.0239412	1.65054
TC203695	0.0603739	1.99574	0.0106866	2.73553
tre-5	0.359418	1.5503	0.0436085	2.82212
W01A11.7	0.692314	1.14935	0.0303826	2.3222
W04B5.2	0.00429867	2.05551	0.0183127	1.75078
Y17D7C.3	0.465728	1.24681	0.000275703	4.4111
Y17D7C.3	0.554798	1.29591	0.000723508	6.82759
Y38E10A.23	0.435199	1.74892	0.0496614	4.53255
Y49E10.9	0.211372	2.26549	0.000484931	18.7744
Y49G5A.1	0.267019	1.34508	0.025139	1.91783	+
Y53F4B.26	0.120652	3.38994	0.00679648	10.8496
Y53F4B.7	0.0958562	3.23381	0.00311969	10.9494
ZK1053.1	0.311484	-1.55227	0.0199559	3.05319
ZK250.10	0.110189	2.47797	0.00196122	7.94912
