# Supplementary material for: Endogenous siRNAs promote proteostasis and longevity in germline-less Caenorhabditis elegans
Source: eLife. 2020 Mar 26;9:e50896. doi: 10.7554/eLife.50896 (PMC7136021; doi:10.7554/eLife.50896)
Supplement: Supplementary file 3. [file elife-50896-supp3.xlsx]

## Sheet: analysis (2)
Supplementary File 3. Related to Figure 2. GO analysis of 72 genes whose levels decreased by more than 1.5 fold in dcr-1 glp-1 double mutants compared to glp-1 mutants (p-value<0.05)
GO biological process complete	Caenorhabditis elegans - REFLIST (20057)	72 genes list	72 genes list (expected)	72 genes list (over/under)	72 genes list (fold Enrichment)	72 genes list (P-value)
cellular response to topologically incorrect protein (GO:0035967)	79	7	0.51	+	13.78	0.00313
cellular response to unfolded protein (GO:0034620)	70	6	0.45	+	13.33	0.022
response to topologically incorrect protein (GO:0035966)	89	8	0.57	+	13.98	0.000481
response to unfolded protein (GO:0006986)	74	6	0.48	+	12.61	0.0297
Unclassified (UNCLASSIFIED)	10777	49	69.31	-	0.71	0
cellular response to unfolded protein (GO:0034620)	response to unfolded protein (GO:0006986)	response to topologically incorrect protein (GO:0035966)	cellular response to topologically incorrect protein (GO:0035967)
hsp-16.41	hsp-16.41	F25D7.5	hsp-16.41
hsp-70	hsp-70	hsp-16.41	hsp-70
T27E4.2 hsp-16.1	T27E4.2 hsp-16.1	hsp-70	T27E4.2 hsp-16.1
T27E4.3 hsp-16.48	T27E4.3 hsp-16.48	T27E4.2 hsp-16.1	T27E4.3 hsp-16.48
F44E5.5	F44E5.5	T27E4.3 hsp-16.48	aip-1
C30H6.6 haf-1	C30H6.6 haf-1	aip-1	F44E5.5
		F44E5.5	C30H6.6 haf-1
		C30H6.6 haf-1
