# Supplementary material for: Endogenous siRNAs promote proteostasis and longevity in germline-less Caenorhabditis elegans
Source: eLife. 2020 Mar 26;9:e50896. doi: 10.7554/eLife.50896 (PMC7136021; doi:10.7554/eLife.50896)
Supplement: Supplementary file 4. [file elife-50896-supp4.xlsx]

## Sheet: 132genes_down_GLPvsDCRGLP
Supplementary File 4. Related to Figure 4. 132 genes whose levels increased by more than 1.5 fold in dcr-1 glp-1 double mutants compared to glp-1 single mutants (p-value<0.05).
Probeset ID Gene name	p-value (Wild type vs. dcr-1 (mg375))	Fold-Change (Wild type vs. dcr-1 (mg375))	p-value (glp-1 vs. dcr-1 glp-1)	Fold-Change (glp-1 vs. dcr-1 glp-1)	Appears in rrf-3(-/-) microarray GSE8659
AC7.3	4.30301e-06	-4.92478	0.0108109	-1.83738	Yes
B0207.11	0.0132285	-2.53297	0.0225408	-2.31014	Yes
B0462.1	0.0193784	1.45162	0.000829683	-1.84243	No
C03C10.2	0.00344941	-2.94907	0.012983	-2.38247	Yes
C05C12.1	0.000271984	-3.9679	0.00559945	-2.49444	Yes
C06A5.2	4.04575e-05	-6.93472	0.00338172	-3.07139	Yes
C09B9.4	0.0814726	-1.56	0.0436005	-1.69433	Yes
C16C8.17	0.499755	1.27706	0.045931	-2.18659	Yes
C17B7.12	0.271845	1.30392	0.0229777	-1.82284	Yes
C17F3.1	0.302675	-1.24509	0.0123734	-1.81922	Yes
C17H1.11	0.919196	-1.01818	0.0360063	-1.50749	No
C24D10.8	0.960303	-1.00872	0.00929437	-1.69641	Yes
C34E10.9	0.14043	-2.22346	0.0399333	-3.20955	Yes
C34G6.3	0.000427248	-3.31682	0.00620518	-2.2836	Yes
C35E7.9	4.33475e-05	-2.94195	0.0141502	-1.64231	Yes
C43E11.5	7.54373e-06	-2.75042	0.00107869	-1.78444	Yes
C48B4.12	0.502407	-1.67061	0.0358361	-5.77698	Yes
C50D2.3	6.28392e-06	-2.51689	0.000633534	-1.74317	Yes
CELE_C15H7.3	0.0019952	-3.94062	0.00631086	-3.16487	No
CELE_C24D10.1	0.000238664	-2.63538	0.0172294	-1.68039	No
CELE_C24D10.2	0.0178481	-2.6072	0.0204228	-2.54168	No
CELE_C25D7.16	3.12665e-06	-5.798	2.2954e-05	-4.21683	No
CELE_C34D4.3	0.930099	-1.01981	0.0386601	-1.66258	No
CELE_F09C6.13	0.902104	1.04436	0.0435216	-2.18018	No
CELE_F11D11.3	0.00131102	-5.86722	0.00776442	-3.87871	No
CELE_F25E5.3	0.899104	-1.02448	0.0336118	-1.56517	No
CELE_F36H12.4	0.00233953	-5.87281	0.00730838	-4.41446	No
CELE_F38E1.3	0.00226074	-4.94794	0.00571826	-4.01254	No
CELE_F46A8.3	0.3588	1.31682	0.0193096	-2.17872	No
CELE_F49F1.6	0.261608	1.26097	0.047004	-1.54596	No
CELE_F49F1.7	0.0104555	1.47339	0.00584555	-1.53363	No
CELE_F54D10.4	0.748906	1.19192	0.0482935	-3.24882	No
CELE_F55G11.2	0.0201017	1.60016	0.0226461	-1.58214	No
CELE_F59A6.2	0.00011871	-9.36281	0.0187494	-2.96672	No
CELE_F59C6.3	0.000108292	-2.44747	0.0109684	-1.61045	No
CELE_K03H1.12	0.0045565	-6.64952	0.0113377	-5.08709	No
CELE_R05D8.9	0.718032	-1.15407	0.0391509	-2.45242	No
CELE_T27C10.8	0.0286187	-2.23791	0.030391	-2.21425	No
CELE_T28A11.20	0.628193	-1.16427	0.0405714	-2.01847	No
CELE_T28A11.5	0.261232	1.2797	0.0463435	-1.59138	No
CELE_W02D7.12	0.61479	1.19847	0.0313329	-2.34894	No
CELE_W09G12.6	0.650535	-1.16618	0.00967419	-2.76392	No
CELE_Y47G6A.26	0.0112587	-1.97195	0.0384538	-1.69512	No
CELE_Y57G11C.6	1.45553e-05	-3.45855	0.00387789	-1.88352	No
CELE_Y64G10A.2	0.117505	1.56912	0.0342458	-1.89265	No
CELE_Y73C8C.4	0.97393	1.01061	0.0257721	-2.23485	No
CELE_Y73F8A.15	0.0266375	-2.82473	0.000412322	-7.28442	No
CELE_Y75B8A.23	6.32207e-05	-3.13833	0.0310572	-1.59407	No
CELE_ZC15.10	0.322194	1.12444	0.00219886	-1.55337	No
CELE_ZC204.17	0.231948	-1.82507	0.0419016	-2.96843	No
CELE_ZK354.6	0.00249593	-2.46559	0.00369958	-2.34289	No
CELE_ZK380.5	0.00513998	-1.74627	0.00234057	-1.8731	No
clec-108	0.0571971	1.45754	0.0258494	-1.57663	Yes
clec-245	0.199323	1.27698	0.0246141	-1.58771	Yes
cyc-2.2	0.147448	-1.83668	0.0328621	-2.57666	Yes
cyp-13A12	0.87112	-1.05903	0.0384312	-2.2355	Yes
D1014.2	0.260292	-1.39429	0.00463795	-2.65375	Yes
D1081.3	0.00408523	-3.141	0.0074607	-2.8268	Yes
D1081.5	0.00893625	-2.56142	0.0400958	-2.00347	Yes
D66469	0.14803	1.5356	0.049193	-1.83485	No
dct-9	0.000324333	-3.32646	0.0132217	-2.01798	Yes
F08B4.4	0.99239	-1.00202	0.0142103	-1.81026	Yes
F09C12.8	5.24008e-06	-4.73618	0.00349767	-2.07006	Yes
F10E9.2	2.60707e-06	-4.15536	0.000372642	-2.3166	Yes
F11G11.4	0.000185888	-3.225	0.00779165	-2.02072	Yes
F11G11.8.2	0.893122	1.02753	0.0245343	-1.66291	Yes
F26A1.3	0.00548938	-2.08252	0.00214361	-2.32814	Yes
F26E4.5	0.109587	-1.46161	0.0223909	-1.77781	Yes
F27C1.1	0.718468	-1.13768	0.0485526	-2.15361	Yes
F34D6.7	0.551905	-1.57374	0.0486186	-5.0822	Yes
F35C11.2	0.000117703	-5.66191	0.0479797	-1.97923	Yes
F36A2.12	0.0490315	-2.15584	0.00296431	-3.67875	Yes
F37C12.18	2.70617e-05	-3.70829	0.000212437	-2.84288	Yes
F38A5.8	2.38274e-05	-3.87747	0.0451981	-1.57763	Yes
F38H4.6	0.0013818	-3.14279	0.0436857	-1.86658	Yes
F40G12.10	0.000461021	-2.55457	0.00333185	-2.05117	Yes
F41G3.5	0.011369	-3.10746	0.0328949	-2.49768	Yes
F42C5.5	0.000314023	-1.53048	1.16683e-05	-1.83959	Yes
F43C11.2	0.465597	1.28187	0.0338149	-2.2016	Yes
F52F12.5	0.0209218	-1.96099	0.00676375	-2.28808	Yes
F53H2.1	0.0365845	-1.83516	0.034786	-1.84833	Yes
F55C9.3	0.109353	-1.63609	0.00332549	-2.82667	Yes
fbxb-37	0.308927	1.38598	0.0357389	-2.0678	Yes
htas-1	0.394083	-1.40817	0.0143756	-3.02573	No
ins-23	0.21584	-1.52512	0.0195201	-2.38761	Yes
K01D12.15	0.0164342	-2.39222	0.023641	-2.24943	Yes
K03H1.8	0.000218599	-3.00495	0.0252886	-1.71499	Yes
K05F1.8	0.000140951	-5.36784	0.000405082	-4.41256	Yes
K05F1.9	0.0323776	-1.58036	0.0234561	-1.63376	Yes
K06G5.3	0.68866	1.12953	0.000441913	-4.14039	Yes
kin-26	0.000137418	-3.87867	0.0426257	-1.74959	Yes
M05B5.1	0.0108258	-1.61007	0.0112811	-1.60444	Yes
M176.9	0.0393008	-1.89655	0.0249984	-2.03109	No
mmcm-1	0.248999	1.49773	0.0390564	-2.16442	No
mogs-1	0.144545	1.47182	0.0165677	-1.99187	No
mpz-5	6.74481e-06	-3.51263	0.00537106	-1.75749	No
nep-24	0.295699	1.63484	0.0473295	-2.70012	No
nhr-61	0.580228	1.07528	8.54602e-07	-3.24586	Yes
nspd-1	0.29225	1.20756	0.00201885	-1.95799	Yes
oac-19	0.721025	1.12864	0.0288066	-2.27463	Yes
slcf-2	0.344056	1.31101	0.0476552	-1.83373	No
sls-2.2	0.526436	1.21076	0.0462836	-1.91806	No
sri-40	0.910198	1.04958	0.0273615	-2.87117	Yes
ssp-35	0.264228	-1.28998	0.0116073	-1.90906	No
T02E1.6	0.217381	-1.41483	0.0204823	-2.03632	Yes
T02H6.4	0.168356	-1.40555	0.0120454	-1.98587	Yes
T02H6.7	0.113144	-1.62812	0.0186922	-2.17067	Yes
T09A12.1	4.27894e-05	-3.48266	0.000284022	-2.74299	Yes
T23B7.1	0.480981	1.17852	0.0464907	-1.65075	Yes
TC200467	0.427606	-1.41014	0.0395905	-2.62805	No
TC203179	0.24753	1.97945	0.0194054	-4.55023	No
W01D2.2b	0.7129	1.05697	3.3184e-06	-3.28963	Yes
W04B5.1	0.079852	-1.55639	0.0352479	-1.73063	Yes
W06H8.2	0.352335	1.46791	0.029583	-2.66224	Yes
Y38E10A.9	0.34688	1.26602	0.0352009	-1.77134	Yes
Y48A6B.10	0.781653	-1.07242	0.047846	-1.72201	Yes
Y51B11A.1	0.0263912	-2.38278	0.0212507	-2.48089	Yes
Y52E8A.3	0.974103	1.00929	0.0311975	-1.97432	Yes
Y54G2A.15	0.0173514	-1.52513	0.00612749	-1.6618	Yes
Y6E2A.10	0.0475784	-1.52568	0.0229895	-1.64681	Yes
Y71G12B.3	0.018381	-3.95198	0.0152338	-4.15902	Yes
ZC155.2	4.20747e-07	-8.76536	9.42982e-05	-3.53592	Yes
ZC395.4	3.73821e-05	-2.94565	1.41862e-05	-3.30283	Yes
ZC412.6	0.0571294	1.96949	0.0424067	-2.07789	Yes
ZK402.2	0.229768	-1.67949	0.025606	-2.83962	Yes
ZK402.3	0.494539	-1.20392	0.0330789	-1.88528	Yes
ZK512.10	0.0890444	-1.75704	0.0097618	-2.54581	Yes
ZK616.1	0.00301795	-3.08383	0.00348347	-3.0112	Yes
ZK849.6	0.00791729	-1.76473	0.000312218	-2.44003	Yes
ZK858.2	0.408674	-1.24011	0.00442397	-2.4071	Yes
ZK858.8	0.00771557	-1.49492	0.000257007	-1.90289	Yes
ZK945.6	1.23507e-07	-4.78297	7.05116e-07	-3.79115	Yes
