# Supplementary material for: Endogenous siRNAs promote proteostasis and longevity in germline-less Caenorhabditis elegans
Source: eLife. 2020 Mar 26;9:e50896. doi: 10.7554/eLife.50896 (PMC7136021; doi:10.7554/eLife.50896)
Supplement: Supplementary file 5. [file elife-50896-supp5.xlsx]

## Sheet: גיליון1
Supplementary File 5. Related to Figure 4. Expression of secondary siRNAs of dcr-1 glp-1 vs. glp-1 mutants (Padj < 0.05).
Probeset ID Gene name	Fold-Change (dcr-1 glp-1 vs. glp-1)	padj (dcr-1 glp-1 vs. glp-1)	overlaped gene with the transcriptomes analysis
21ur-13684|F57G8.10	0	2.12e-73
21ur-5316|Y40H7A.87	0	0.000312
alr-1|R08B4.2|R08B4.2	0	0.0428
C04G6.10|C04G6.10|C04G6.10	0	0.02
C35D6.3|C35D6.3|C35D6.3	0	0.000312
C40A11.10|C40A11.10|C40A11.10	0	0
F31A9.2|F31A9.2|F31A9.2	0	2.34e-38
F39C12.7|F39C12.7	0	0.0389
F56D6.12|F56D6.12|F56D6.12	0	0.0026
fbxa-46|F52D2.8|F52D2.8a	0	5.54e-28
fbxa-46|F52D2.8|F52D2.8b	0	7.68e-33
fbxb-37|T16A1.8|T16A1.8	0	7.63e-12
inx-14|F07A5.1|F07A5.1a	0	0.0389
nspe-2|Y38E10A.26|Y38E10A.26	0	0.0103
T05E12.10|T05E12.10|T05E12.10	0	5.84e-09
T28F12.4|T28F12.4	0	0.02
Y17D7C.6|Y17D7C.6	0	7.42e-267
Y43F8B.6|Y43F8B.6|Y43F8B.6	0	1.18e-39
Y50E8A.10|Y50E8A.10|Y50E8A.10	0	0.000639
Y57G11C.1131|Y57G11C.1131|Y57G11C.1131	0	8.78e-06
Y57G11C.1134|Y57G11C.1134|Y57G11C.1134	0	5.02e-16
Y82E9BR.6|Y82E9BR.6|Y82E9BR.6	0	3.49e-21
ZK795.6|ZK795.6	0	7.53e-05
Y105C5A.1271|Y105C5A.1271	0.000129	0
Y7A9A.79|Y7A9A.79	0.00046	0
ZK380.5|ZK380.5|ZK380.5	0.00052	0	+
C18D4.11|C18D4.11	0.000682	6.55e-251
Y37E11B.2|Y37E11B.2|Y37E11B.2	0.000916	NaN
W04B5.1|W04B5.1|W04B5.1	0.00121	NaN	+
fbxa-52|F07G6.6|F07G6.6	0.00125	0
Y36E3A.2|Y36E3A.2|Y36E3A.2	0.00126	0
T08B6.2|T08B6.2	0.00127	0
F39E9.10|F39E9.10	0.00137	0
H16D19.7|H16D19.7	0.00142	0
E01G4.5|E01G4.5|E01G4.5	0.00154	0
E01G4.7|E01G4.7	0.00164	0
ZK402.2|ZK402.2|ZK402.2	0.00168	0	+
F40D4.16|F40D4.16	0.00173	0
Y43F8B.8|Y43F8B.8	0.00198	4.39e-208
ZK402.3|ZK402.3|ZK402.3	0.00223	0	+
K02E2.6|K02E2.6|K02E2.6	0.00228	0
C44B11.6|C44B11.6|C44B11.6	0.00276	0
F55C9.3|F55C9.3|F55C9.3	0.00321	0	+
C36A4.11|C36A4.11|C36A4.11	0.00353	0
K06B9.6|K06B9.6|K06B9.6	0.00361	0
CD4.8|CD4.8|CD4.8	0.0038	0
C18D4.4|C18D4.4|C18D4.4b	0.00391	0
Y43F8B.9|Y43F8B.9|Y43F8B.9	0.00393	1.78e-264
ZK402.5|ZK402.5|ZK402.5	0.00415	0
Y116F11A.1|Y116F11A.1|Y116F11A.1	0.00447	4.76e-65
mir-260|F39E9.13	0.00457	0
H09G03.1|H09G03.1|H09G03.1	0.00486	0
F31E9.11|F31E9.11	0.00502	0
C36A4.14|C36A4.14	0.00531	0
T05E12.8|T05E12.8|T05E12.8	0.00562	6.62e-93
F39E9.7|F39E9.7|F39E9.7	0.00564	0
Y17D7C.3|Y17D7C.3	0.00574	0
Y59H11AR.6|Y59H11AR.6	0.00637	0
Y17D7C.1|Y17D7C.1|Y17D7C.1	0.00676	3.46e-29
C11G6.2|C11G6.2|C11G6.2	0.00677	8.32e-23
W04B5.2|W04B5.2|W04B5.2	0.00747	0
W05H12.2|W05H12.2|W05H12.2	0.00747	0
Y105C5A.14|Y105C5A.14	0.00757	0
T02G6.10|T02G6.10	0.00766	2.67e-272
F55C9.5|F55C9.5|F55C9.5	0.00819	0
K02E2.11|K02E2.11|K02E2.11	0.0082	0
H16D19.4|H16D19.4	0.00849	5.28e-116
C18D4.4|C18D4.4|C18D4.4a	0.00924	0
Y17D7B.4|Y17D7B.4|Y17D7B.4	0.00925	0
H16D19.6|H16D19.6	0.0113	4.82e-42
Y105C5A.1272|Y105C5A.1272|Y105C5A.1272	0.0139	0
F19G12.10|F19G12.10|F19G12.10	0.0156	2.32e-35
Y18H1A.14|Y18H1A.14|Y18H1A.14	0.0166	7.56e-07
ZK402.1|ZK402.1|ZK402.1	0.0178	2.79e-83
Y46D2A.1|Y46D2A.1|Y46D2A.1	0.0183	9.49e-132
ZC132.4|ZC132.4|ZC132.4	0.0189	4.51e-91
F19G12.9|F19G12.9|F19G12.9	0.0193	3.57e-21
ZK384.4|ZK384.4	0.0198	0
fbxc-38|C02B8.2|C02B8.2	0.0201	2.82e-14
CD4.7|CD4.7|CD4.7a	0.0208	5.62e-34
sls-2.6|W06D4.7	0.0209	0.00868
Y116A8B.1|Y116A8B.1|Y116A8B.1	0.0211	9.48e-181
F39F10.4|F39F10.4|F39F10.4	0.0225	6.03e-06
Y82E9BR.20|Y82E9BR.20|Y82E9BR.20	0.0233	3.06e-27
CD4.7|CD4.7|CD4.7b	0.0241	1.47e-33
Y43F8B.7|Y43F8B.7	0.0253	4.11e-33
F46C3.7|F46C3.7|F46C3.7	0.0257	5.62e-34
Y13C8A.1|Y13C8A.1|Y13C8A.1	0.0259	1.37e-34
F14F7.5|F14F7.5|F14F7.5	0.027	2.56e-109
fbxc-37|F31A9.4|F31A9.4	0.027	3.44e-18
Y19D10A.7|Y19D10A.7|Y19D10A.7	0.0278	0.00245
Y49E10.30|Y49E10.30|Y49E10.30	0.0283	2.22e-35
fbxa-61|Y119D3B.8|Y119D3B.8	0.029	2.71e-122
Y110A2AL.4|Y110A2AL.4|Y110A2AL.4a	0.0298	7.41e-93
C01A2.1|C01A2.1|C01A2.1	0.0306	2.59e-128
Y43F8B.22|Y43F8B.22|Y43F8B.22	0.0318	3.66e-72
W04A8.4|W04A8.4|W04A8.4	0.0333	1.44e-108
H16D19.5|H16D19.5	0.0334	5.22e-11
Y46H3C.7|Y46H3C.7|Y46H3C.7	0.0335	1.48e-51
F55A4.4|F55A4.4|F55A4.4	0.034	4.26e-114
Y51H7C.15|Y51H7C.15|Y51H7C.15	0.0349	3.76e-32
C34F11.2|C34F11.2|C34F11.2	0.0389	4.65e-05
C39B5.2|C39B5.2|C39B5.2	0.0457	0.00129
K09F6.5|K09F6.5|K09F6.5	0.047	3.93e-07
Y43F8B.3|Y43F8B.3|Y43F8B.3b	0.0474	0.000142
Y43F8B.3|Y43F8B.3|Y43F8B.3d	0.0488	0.000267
F58F9.1|F58F9.1|F58F9.1	0.0492	4.11e-58
Y105C5A.25|Y105C5A.25	0.0492	1.45e-165
col-131|C39E9.3|C39E9.3	0.0527	0.000344
W04B5.6|W04B5.6|W04B5.6	0.0536	3.42e-55
E02H9.6|E02H9.6|E02H9.6	0.0543	3.42e-55
F29G9.1|F29G9.1|F29G9.1	0.0596	6.13e-68
pqn-11|C09G1.1|C09G1.1	0.0608	1.29e-186
Y62F5A.11|Y62F5A.11	0.0612	6.45e-22
Y43F8B.17|Y43F8B.17	0.0615	8.72e-31
F12F6.13|F12F6.13	0.0617	3.56e-40
F12F6.14|F12F6.14	0.0617	3.56e-40
F56D6.13|F56D6.13|F56D6.13	0.0633	0.0313
F57C7.4|F57C7.4|F57C7.4	0.0635	6.88e-12
clx-1|C50F7.2|C50F7.2	0.0644	2.28e-273
F56A4.9|F56A4.9|F56A4.9	0.0647	0.00174
tag-242|C14A4.1|C14A4.1	0.0658	7.14e-06
F10G7.12|F10G7.12|F10G7.12	0.0666	2.88e-05
F46F5.6|F46F5.6|F46F5.6	0.0686	0.000204
ZK546.7|ZK546.7|ZK546.7	0.0742	0.00575
mir-262|ZK384.5	0.0769	4.26e-31
T24D3.2|T24D3.2|T24D3.2	0.0787	0.000363
F10C1.3|F10C1.3|F10C1.3	0.0794	2.92e-10
F19G12.4|F19G12.4|F19G12.4	0.0814	2.88e-05
D2062.7|D2062.7|D2062.7	0.0816	2.98e-15
Y17D7B.7|Y17D7B.7	0.0819	4.58e-181
ttr-9|C33A12.15|C33A12.15	0.0842	0.0102
T25G12.11|T25G12.11|T25G12.11	0.0843	2.34e-77
F13E9.11|F13E9.11|F13E9.11a	0.0862	0.0291
C30G7.3|C30G7.3|C30G7.3	0.088	2.11e-15
C40H5.7|C40H5.7|C40H5.7	0.0954	3.57e-28
F46A8.7|F46A8.7|F46A8.7	0.0956	1.13e-31
C09B9.4|C09B9.4|C09B9.4	0.101	7.39e-06
