# Supplementary material for: Endogenous siRNAs promote proteostasis and longevity in germline-less Caenorhabditis elegans
Source: eLife. 2020 Mar 26;9:e50896. doi: 10.7554/eLife.50896 (PMC7136021; doi:10.7554/eLife.50896)
Supplement: Supplementary file 6. [file elife-50896-supp6.xlsx]

## Sheet: David 132 genes
Supplementary File 6. Related to Figure 4. DAVID analysis of 132 genes whose levels increased by more than 1.5 fold in dcr-1 glp-1 double mutants compared to glp-1 mutants (p-value<0.05)
Category	Term	Count	%	P-Value	Genes	List Total	Pop Hits	Pop Total	Fold Enrichment	Bonferroni	Benjamini	FDR
GOTERM_BP_DIRECT	GO:0035335~peptidyl-tyrosine dephosphorylation	8	6.50407	2.74e-07	172022, 185664, 187450, 179927, 182639, 177291, 190372, 185271	48	111	11627	17.458	1.15e-05	1.15e-05	0.000254
GOTERM_BP_DIRECT	GO:0008360~regulation of cell shape	7	5.69106	2.5e-06	191293, 178032, 185631, 177271, 182156, 179220, 175639	48	98	11627	17.3021	0.000105	5.24e-05	0.00230976
GOTERM_BP_DIRECT	GO:0006470~protein dephosphorylation	8	6.50407	6.1e-06	172022, 185664, 187450, 179927, 182639, 177291, 190372, 185271	48	176	11627	11.0104	0.000256	8.54e-05	0.00564529
GOTERM_BP_DIRECT	GO:0018105~peptidyl-serine phosphorylation	7	5.69106	1.34e-05	191293, 178032, 185631, 177271, 182156, 179220, 175639	48	131	11627	12.9435	0.000563	0.000141	0.0124074
GOTERM_BP_DIRECT	GO:0006468~protein phosphorylation	10	8.13008	4.9e-05	191293, 172828, 13186458, 178032, 185631, 177271, 177575, 182156, 179220, 175639	48	433	11627	5.59421	0.00205689	0.000412	0.0453613
GOTERM_CC_DIRECT	GO:0005856~cytoskeleton	4	3.25203	0.0396671	185481, 171779, 173982, 172987	39	227	11373	5.1386	0.517394	0.517394	25.796
GOTERM_MF_DIRECT	GO:0004725~protein tyrosine phosphatase activity	8	6.50407	2.64e-07	172022, 185664, 187450, 179927, 182639, 177291, 190372, 185271	39	113	9479	17.2072	1.19e-05	1.19e-05	0.000248
GOTERM_MF_DIRECT	GO:0004672~protein kinase activity	10	8.13008	2.49e-05	191293, 172828, 13186458, 178032, 185631, 177271, 177575, 182156, 179220, 175639	39	408	9479	5.95714	0.00111874	0.00056	0.0233903
GOTERM_MF_DIRECT	GO:0004674~protein serine/threonine kinase activity	7	5.69106	0.000959	191293, 178032, 185631, 177271, 182156, 179220, 175639	39	291	9479	5.84659	0.0422426	0.0142839	0.897942
GOTERM_MF_DIRECT	GO:0005524~ATP binding	10	8.13008	0.0110711	191293, 172828, 13186458, 178032, 185631, 177271, 177575, 182156, 179220, 175639	39	950	9479	2.55843	0.394061	0.117718	9.94024
GOTERM_MF_DIRECT	GO:0004715~non-membrane spanning protein tyrosine kinase activity	3	2.43902	0.0163473	172828, 13186458, 177575	39	49	9479	14.8807	0.523699	0.137863	14.359
GOTERM_MF_DIRECT	GO:0004713~protein tyrosine kinase activity	3	2.43902	0.042514	172828, 13186458, 177575	39	82	9479	8.89212	0.858434	0.278073	33.5396
INTERPRO	IPR000242:Protein-tyrosine phosphatase, receptor/non-receptor type	8	6.50407	1.66e-07	172022, 185664, 187450, 179927, 182639, 177291, 190372, 185271	65	93	14476	19.1577	1.24e-05	1.24e-05	0.000174
INTERPRO	IPR003595:Protein-tyrosine phosphatase, catalytic	8	6.50407	2.06e-07	172022, 185664, 187450, 179927, 182639, 177291, 190372, 185271	65	96	14476	18.559	1.55e-05	7.74e-06	0.000217
INTERPRO	IPR000387:Protein-tyrosine/Dual specificity phosphatase	6	4.87805	4.74e-05	187450, 179927, 182639, 177291, 190372, 185271	65	90	14476	14.8472	0.00355043	0.00118488	0.0497586
INTERPRO	IPR000719:Protein kinase, catalytic domain	10	8.13008	8.02e-05	191293, 172828, 13186458, 178032, 185631, 177271, 177575, 182156, 179220, 175639	65	414	14476	5.37941	0.00599903	0.00150314	0.0841641
INTERPRO	IPR000535:Major sperm protein	6	4.87805	0.00014	179681, 185481, 171779, 173982, 172987, 177488	65	113	14476	11.8252	0.010453	0.0020994	0.146935
INTERPRO	IPR008962:PapD-like	6	4.87805	0.000152	179681, 185481, 171779, 173982, 172987, 177488	65	115	14476	11.6195	0.0113472	0.00190021	0.159567
INTERPRO	IPR011009:Protein kinase-like domain	10	8.13008	0.000248	191293, 172828, 13186458, 178032, 185631, 177271, 177575, 182156, 179220, 175639	65	481	14476	4.6301	0.0184628	0.00265865	0.260432
INTERPRO	IPR017441:Protein kinase, ATP binding site	7	5.69106	0.000974	191293, 172828, 13186458, 178032, 177575, 182156, 179220	65	259	14476	6.01913	0.070484	0.0090948	1.01758
INTERPRO	IPR000980:SH2 domain	4	3.25203	0.0027093	172828, 181840, 13186458, 177575	65	63	14476	14.1402	0.184108	0.0223545	2.80713
INTERPRO	IPR008266:Tyrosine-protein kinase, active site	3	2.43902	0.0393364	172828, 13186458, 177575	65	71	14476	9.41018	0.9507	0.259909	34.3726
INTERPRO	IPR020635:Tyrosine-protein kinase, catalytic domain	3	2.43902	0.0403473	172828, 13186458, 177575	65	72	14476	9.27949	0.954443	0.24482	35.0937
SMART	SM00194:PTPc	8	6.50407	1.29e-07	172022, 185664, 187450, 179927, 182639, 177291, 190372, 185271	29	86	5688	18.2454	2.07e-06	2.07e-06	9.18e-05
SMART	SM00404:PTPc_motif	8	6.50407	2.77e-07	172022, 185664, 187450, 179927, 182639, 177291, 190372, 185271	29	96	5688	16.3448	4.44e-06	2.22e-06	0.000197
SMART	SM00220:S_TKc	6	4.87805	0.010782	191293, 178032, 185631, 177271, 182156, 179220	29	280	5688	4.20296	0.15924	0.0561766	7.40939
SMART	SM00252:SH2	3	2.43902	0.0305555	172828, 13186458, 177575	29	56	5688	10.5074	0.391351	0.116733	19.7778
SMART	SM00219:TyrKc	3	2.43902	0.0483348	172828, 13186458, 177575	29	72	5688	8.17241	0.547366	0.146606	29.6589
UP_KEYWORDS	Tyrosine-protein kinase	3	2.43902	0.0514569	172828, 13186458, 177575	118	63	20248	8.17111	0.911971	0.911971	39.3057

## Sheet: 18 enrichment genes
18 significant protein modifying genes such as kinases and phosphatases
Probeset ID Gene name	Entrez number	Gene Name
C43E11.5	172022	hypothetical protein(C43E11.5)
F26E4.5	172828	Tyrosine-protein kinase(F26E4.5)
F26A1.3	175639	hypothetical protein(F26A1.3)
C09B9.4	177271	hypothetical protein(C09B9.4)
C24D10.1	177291	hypothetical protein(C24D10.1)
KIN-26	177575	Tyrosine-protein kinase(kin-26)
C05C12.1	178032	hypothetical protein(C05C12.1)
F38E1.3	179220	hypothetical protein(F38E1.3)
F40G12.10	179927	hypothetical protein(F40G12.10)
C03C10.2	182156	Putative casein kinase I C03C10.2(C03C10.2)
C15H7.3	182639	Putative tyrosine-protein phosphatase C15H7.3(C15H7.3)
F35C11.2	185271	hypothetical protein(F35C11.2)
F41G3.5	185631	hypothetical protein(F41G3.5)
F42C5.5	185664	hypothetical protein(F42C5.5)
M05B5.1	187450	hypothetical protein(M05B5.1)
Y57G11C.6	190372	hypothetical protein(Y57G11C.6)
ZK354.6	191293	hypothetical protein(ZK354.6)
M176.9	13186458	Tyrosine-protein kinase(M176.9)
