# Supplementary material for: Endogenous siRNAs promote proteostasis and longevity in germline-less Caenorhabditis elegans
Source: eLife. 2020 Mar 26;9:e50896. doi: 10.7554/eLife.50896 (PMC7136021; doi:10.7554/eLife.50896)
Supplement: Supplementary file 7. [file elife-50896-supp7.xlsx]

## Sheet: גיליון1
Supplementary File 7. Related to Figure 4. RNAi lifespan screen of dcr-1 glp-1 double mutant
Probeset ID Gene name	affect on dcr-1 glp-1 life-span	Comment
C43E11.5	No RNAi	protein modifying gene
F26E4.5	Improved	protein modifying gene
F26A1.3	Improved	protein modifying gene
C09B9.4	Not improved	protein modifying gene
C24D10.1	Improved	protein modifying gene
KIN-26	Not improved	protein modifying gene
C05C12.1	Not improved	protein modifying gene
F38E1.3	Not improved	protein modifying gene
F40G12.10	Not improved	protein modifying gene
C03C10.2	Improved	protein modifying gene
C15H7.3	Not improved	protein modifying gene
F35C11.2	No RNAi	protein modifying gene
F41G3.5	Not improved	protein modifying gene
F42C5.5	No RNAi	protein modifying gene
M05B5.1	Improved	protein modifying gene
Y57G11C.6	No RNAi	protein modifying gene
ZK354.6	No RNAi	protein modifying gene
M176.9	No RNAi	protein modifying gene
ZK380.5	No RNAi	putative direct endo-siRNA target
W04B5.1	Improved	putative direct endo-siRNA target
ZK402.2	Improved	putative direct endo-siRNA target
ZK402.3	Improved	putative direct endo-siRNA target
F55C9.3	No RNAi	putative direct endo-siRNA target
dcr-1 glp-1 eggs were treated with RNAi against the listed genes until day 11.
Viability of the animals in the plates were qualitatively scored at days 9-11 as improved or not improved.
RNAi identity was verified by sequencing. Genes whose RNAi identity was not supported by sequencing are noted as no RNAi.
