# Supplementary material for: Endogenous siRNAs promote proteostasis and longevity in germline-less Caenorhabditis elegans
Source: eLife. 2020 Mar 26;9:e50896. doi: 10.7554/eLife.50896 (PMC7136021; doi:10.7554/eLife.50896)
Supplement: Supplementary file 8. [file elife-50896-supp8.xlsx]

## Sheet: Sheet1
Supplementary File 8. Statistical data
Heat shock survival assay- Cochran-Mantel-Haenszel
comp	X2 statistic	degrees of freedom	p-value	adjusted p-value	Fig. 3A
wild-type vs. dcr-1	1.83052e-05	1	0.996586	0.996586
wild-type vs. glp-1	48.5027	1	3.2984e-12	4.9476e-12
glp-1 vs. dcr-1 glp-1	51.4127	1	7.48541e-13	2.24562e-12
comp	X2 statistic	degrees of freedom	p-value	adjusted p-value	Fig. 3B
wild-type vs. rrf-3	0.0161654	1	0.898827	0.898827
wild-type vs. glp-1	30.6982	1	3.01451e-08	9.04353e-08
glp-1 vs. rrf-3 glp-1	24.5123	1	7.38372e-07	1.10756e-06
comp	X2 statistic	degrees of freedom	p-value	adjusted p-value	Fig. 5A
wild-type vs. ptp-5.1	0.470379	1	0.492813	0.529644
dcr-1 vs. dcr-1;ptp-5.1	0.395075	1	0.529643	0.529644
glp-1 vs. glp-1;ptp-5.1	1.75933	1	0.184708	0.369416
dcr-1 glp-1 vs. dcr-1 glp-1;ptp-5.1	14.3827	1	0.000149169	0.000596676
UNC-52 assay- Cochran-Mantel-Haenszel
comp	X2 statistic	degrees of freedom	p-value	adjusted p-value	Fig. 3D
wild-type vs. dcr-1	0.59637	1	0.439966	0.439966
wild-type vs. glp-1	161.268	1	5.97812e-37	1.79344e-36
glp-1 vs. dcr-1 glp-1	15.9132	1	6.63138e-05	9.94707e-05
Q35 assay- One-Way ANOVA followed by Tueky's post hoc analysis
		degrees of freedom	p-value	F	Fig. 3C
		4	0.002	9.259
comp	p-value
Q0 vs. Q35m	0.02
Q35m vs. glp-1;Q35m	0.024
glp-1 Q35m vs. dcr-1 glp-1;Q35m	0.018
HSF-1::GFP assay- One-Way ANOVA followed by Tueky's post hoc analysis
		degrees of freedom	p-value	F	Fig. 2C
		7	<0.001	18.27
comp	p-value
wild type vs. dcr-1	0.999
wild type vs. glp-1	0.021
glp-1 vs. dcr-1 glp-1	0.002
wild type vs. dcr-1 glp-1	0.94
		degrees of freedom	p-value	F
		7	0.002	5.778	Fig. 5B
comp	p-value
wild-type vs. ptp-5.1	1
dcr-1 vs. dcr-1;ptp-5.1	1
glp-1 vs. glp-1;ptp-5.1	0.839
dcr-1 glp-1 vs. dcr-1 glp-1;ptp-5.1	0.032
Western Blot- one sample Test and One-way ANOVA followed by Tueky's post hoc analysis
	p-value				Fig. 2B
wild-type vs. dcr-1	0.0559	1-sample t-test
wild-type vs. glp-1	0.0042	1-sample t-test
wild-type vs. dcr-1 glp-1	0.002	1-sample t-test
	p-value
	0.0649	ANOVA
wild-type vs. dcr-1	0.5769	Tukey
wild-type vs. glp-1	0.054	Tukey
glp-1 vs. dcr-1 glp-1	0.3154	Tukey
ptp-5.1::gfp transgene assay - Cochran-Mantel-Haenszel					Fig. 4C
comp	X2 statistic	degrees of freedom	p-value	adjusted p-value
wild-type vs. dcr-1	13.2479	1	0.000272889	0.000545778
wild-type vs. glp-1	2.52546	1	0.112022	0.14936
glp-1 vs. dcr-1 glp-1	29.5802	1	5.36492e-08	2.14597e-07
dcr-1 vs. dcr-1 glp-1	1.38404	1	0.239414	0.239414
